# Supplementary material
Source: PubMed Central journal article supplement (PMC8096374)
Supplement: djaa174_supplementary_data.pdf [file djaa174_supplementary_data.pdf]

## SUPPLEMENTARY MATERIALS

### Supplementary Methods

#### Search strategy

Our PubMed search for each approved immunotherapy drug used the following search terms: (quality of life [MeSH Terms] OR quality of life [Text Word] OR patient reported outcomes [Text Word] AND drug approved name [All Fields]). If the trial protocol was not available online, we contacted the authors by email to ask for a copy. If no answer was received after follow-up, data were collected only from the published manuscripts. If discrepancies were found between the documents, information was taken first from the clinical study report, and then from the trial protocol.

#### Data collection

The data extraction sheet included 47 predefined evaluation criteria, which were divided into six categories: (a) general trial description, (b) reporting of research hypothesis and objectives, (c) PRO instruments, (d) clinical relevance, (e) statistical analysis, and (f) handling of missing data.

##### *(a) General trial description*

We reported the general characteristics of each trial, including whether it was randomized or single-arm, the line-of-therapy indication in the drug authorization, the sample size of the analyzed population. For the published manuscripts, we reported the impact factor (IF) of the journal of publication during the year of publication. Only the IF of the journal that published the manuscript reporting the main clinical trial result (the primary manuscript) was used for analyses if no separate PRO manuscript was published.

##### *(b) Reporting of specific hypothesis and research objectives*

For each trial that led to a drug receiving FDA approval, we reported whether a specific hypothesis that stated a direction, domain of interest, and specified time frame was defined to inform the analysis of the PRO endpoint. The definition of “broad hypothesis” was adopted from a previous systematic review.<sup>14</sup> We also reported whether the evaluation of PROs was stated as a primary, secondary, or exploratory endpoint in the trial’s final protocol.

##### *(c) PRO instruments*

We identified the PRO instruments used in each clinical trial. We also reported the PRO collection method and whether the instruments were cancer site specific and validated.

##### *(d) Clinical relevance*

The threshold for clinical relevance was defined as a clinically meaningful within-patient or within-treatment-group change in PRO score from baseline over the course of therapy, or as a clinically meaningful difference in PRO scores between groups. We reported whether each study specified a threshold for clinical relevance and whether a reference that justified the threshold was cited.

##### *(e) Statistical analysis*

We reported the primary statistical techniques used to measure the outcomes of interest in each trial. We also reported whether a correction for type I error was done when needed and we determined whether a trial reported a completion/compliance rate of the PRO instruments.

##### *(f) Handling missing data*

We reported whether a method to handle missing data was defined in the trial protocol or in the methods section of the manuscript. We also reported whether a trial provided details about the reasons for missing data.

## REFERENCES

1. Nghiem P, Bhatia S, Lipson EJ, et al. Durable tumor regression and overall survival in patients with advanced Merkel cell carcinoma receiving pembrolizumab as first-line therapy. *J Clin Oncol*. 2019;37(9):693-702.
2. Socinski MA, Jotte RM, Cappuzzo F, et al. Atezolizumab for first-line treatment of metastatic nonsquamous NSCLC. *N Engl J Med*. 2018;378(24):2288-2301.
3. Zhu AX, Finn RS, Edeline J, et al. Pembrolizumab in patients with advanced hepatocellular carcinoma previously treated with sorafenib (KEYNOTE-224): a non-randomised, open-label phase 2 trial. *Lancet Oncol*. 2018;19(7):940-952.
4. Paz-Ares L, Luft A, Vicente D, et al. Pembrolizumab plus Chemotherapy for Squamous Non-Small-Cell Lung Cancer. *N Engl J Med*. 2018;379(21):2040-2051.
5. Migden MR, Rischin D, Schmults CD, et al. PD-1 Blockade with Cemiplimab in Advanced Cutaneous Squamous-Cell Carcinoma. *N Engl J Med*. 2018;379(4):341-351.
6. Gandhi L, Rodríguez-Abreu D, Gadgeel S, et al. Pembrolizumab plus chemotherapy in metastatic non-small-cell lung cancer. *N Engl J Med*. 2018;378(22):2078-2092.
7. Ready N, Farago AF, de Braud F, et al. Third-Line Nivolumab Monotherapy in Recurrent SCLC: CheckMate 032. *J Thorac Oncol*. 2019;14(2):237-244.
8. Overman MJ, Lonardi S, Wong KYM, et al. Durable Clinical Benefit With Nivolumab Plus Ipilimumab in DNA Mismatch Repair-Deficient/Microsatellite Instability-High Metastatic Colorectal Cancer. *J Clin Oncol*. 2018;36(8):773-779.
9. Armand P, Rodig SJ, Melnichenko V, et al. Pembrolizumab in Patients with Relapsed or Refractory Primary Mediastinal Large B-Cell Lymphoma (PMBCL): Data from the Keynote-013 and Keynote-170 Studies. *Blood*. 2018;132(Suppl 1):228.
10. Chung HC, Ros W, Delord JP, et al. Efficacy and safety of pembrolizumab in previously treated advanced cervical cancer: Results from the phase II KEYNOTE-158 study. *J Clin Oncol*. 2019;37(17):1470-1478.
11. Schuster SJ, Bishop MR, Tam CS, et al. Tisagenlecleucel in Adult Relapsed or Refractory Diffuse Large B-Cell Lymphoma. *N Engl J Med*. 2019;380(1):45-56.
12. Motzer RJ, Tannir NM, McDermott DF, et al. Nivolumab plus Ipilimumab versus Sunitinib in advanced renal-cell carcinoma. *N Engl J Med*. 2018;378(14):1277-1290.
13. Antonia SJ, Villegas A, Daniel D, et al. Durvalumab after chemoradiotherapy in stage III non-small-cell lung cancer. *N Engl J Med*. 2017;377(20):1919-1929.
14. Weber J, Mandala M, Del Vecchio M, et al. Adjuvant Nivolumab versus Ipilimumab in Resected Stage III or IV Melanoma. *N Engl J Med*. 2017;377(19):1824-1835.
15. S.S N, F.L L, N.L B, et al. Axicabtagene ciloleucel CAR T-cell therapy in refractory large B-Cell lymphoma. *N Engl J Med*. 2017;377(26):2531-2544.
16. El-Khoueiry AB, Sangro B, Yau T, et al. Nivolumab in patients with advanced hepatocellular carcinoma (CheckMate 040): an open-label, non-comparative, phase 1/2 dose escalation and expansion trial. *Lancet*. 2017;389(10088):2492-2502.
17. Fuchs CS, Doi T, Jang RW, et al. Safety and Efficacy of Pembrolizumab Monotherapy in Patients With Previously Treated Advanced Gastric and Gastroesophageal Junction Cancer: Phase 2 Clinical KEYNOTE-059 Trial. *JAMA Oncol*. 2018;4(5):e180013.
18. Maude SL, Laetsch TW, Buechner J, et al. Tisagenlecleucel in children and young adults with B-cell lymphoblastic leukemia. *N Engl J Med*. 2018;378(5):439-448.
19. Overman MJ, McDermott R, Leach JL, et al. Nivolumab in patients with metastatic DNA mismatch repair-deficient or microsatellite instability-high colorectal cancer (CheckMate 142): an open-label, multicentre, phase 2 study. *Lancet Oncol*. 2017;18(9):1182-1191.
20. Bellmunt J, De Wit R, Vaughn DJ, et al. Pembrolizumab as second-line therapy for advanced urothelial carcinoma. *N Engl J Med*. 2017;376(11):1015-1026.

21. C.J.L, S.M.G, H.B, et al. Carboplatin and pemetrexed with or without pembrolizumab for advanced, non-squamous non-small-cell lung cancer: a randomised, phase 2 cohort of the open-label KEYNOTE-021 study. *Lancet Oncol.* 2016;17(11):1497-1508.
22. Patel MR, Ellerton J, Infante JR, et al. Avelumab in metastatic urothelial carcinoma after platinum failure (JAVELIN Solid Tumor): pooled results from two expansion cohorts of an open-label, phase 1 trial. *Lancet Oncol.* 2018;19(1):51-64.
23. Powles T, O'Donnell PH, Massard C, et al. Efficacy and Safety of Durvalumab in Locally Advanced or Metastatic Urothelial Carcinoma: Updated Results From a Phase 1/2 Open-label Study. *JAMA Oncol.* 2017;3(9):e172411.
24. Kaufman HL, Russell JS, Hamid O, et al. Updated efficacy of avelumab in patients with previously treated metastatic Merkel cell carcinoma after ≥1 year of follow-up: JAVELIN Merkel 200, a phase 2 clinical trial. *J Immunother Cancer.* 2018;6(1):7.
25. Chen R, Zinzani PL, Fanale MA, et al. Phase II Study of the Efficacy and Safety of Pembrolizumab for Relapsed/Refractory Classic Hodgkin Lymphoma. *J Clin Oncol.* 2017;35(19):2125-2132.
26. Sharma P, Retz M, Siefker-Radtke A, et al. Nivolumab in metastatic urothelial carcinoma after platinum therapy (CheckMate 275): a multicentre, single-arm, phase 2 trial. *Lancet Oncol.* 2017;18(3):312-322.
27. Ferris RL, Blumenschein G, Fayette J, et al. Nivolumab for recurrent squamous-cell carcinoma of the head and neck. *N Engl J Med.* 2016;375(19):1856-1867.
28. Reck M, Rodriguez-Abreu D, Robinson AG, et al. Pembrolizumab versus Chemotherapy for PD-L1-Positive Non-Small-Cell Lung Cancer. *N Engl J Med.* 2016;375(19):1823-1833.
29. Herbst RS, Baas P, Kim DW, et al. Pembrolizumab versus docetaxel for previously treated, PD-L1-positive, advanced non-small-cell lung cancer (KEYNOTE-010): A randomised controlled trial. *Lancet.* 2016;387(10027):1540-1550.
30. Rittmeyer A, Barlesi F, Waterkamp D, et al. Atezolizumab versus docetaxel in patients with previously treated non-small-cell lung cancer (OAK): a phase 3, open-label, multicentre randomised controlled trial. *Lancet.* 2017;389(10066):255-265.
31. Fehrenbacher L, Spira A, Ballinger M, et al. Atezolizumab versus docetaxel for patients with previously treated non-small-cell lung cancer (POPLAR): A multicentre, open-label, phase 2 randomised controlled trial. *Lancet.* 2016;387(10030):1837-1846.
32. Mehra R, Seiwert TY, Gupta S, et al. Efficacy and safety of pembrolizumab in recurrent/metastatic head and neck squamous cell carcinoma: pooled analyses after long-term follow-up in KEYNOTE-012. *Br J Cancer.* 2018;119(2):153-159.
33. Rosenberg JE, Hoffman-Censits J, Powles T, et al. Atezolizumab in patients with locally advanced and metastatic urothelial carcinoma who have progressed following treatment with platinum-based chemotherapy: A single-arm, multicentre, phase 2 trial. *Lancet.* 2016;387(10031):1909-1920.
34. Younes A, Santoro A, Shipp M, et al. Nivolumab for classical Hodgkin's lymphoma after failure of both autologous stem-cell transplantation and brentuximab vedotin: a multicentre, multicohort, single-arm phase 2 trial. *Lancet Oncol.* 2016;17(9):1283-1294.
35. Motzer RJ, Escudier B, McDermott DF, et al. Nivolumab versus Everolimus in Advanced Renal-Cell Carcinoma. *N Engl J Med.* 2015;373(19):1803-1813.
36. Eggermont AMM, Chiarion-Sileni V, Grob JJ, et al. Adjuvant ipilimumab versus placebo after complete resection of high-risk stage III melanoma (EORTC 18071): A randomised, double-blind, phase 3 trial. *Lancet Oncol.* 2015;16(5):522-530.
37. Borghaei H, Paz-Ares L, Horn L, et al. Nivolumab versus docetaxel in advanced nonsquamous non-small-cell lung cancer. *N Engl J Med.* 2015;373(17):1627-1639.
38. Garon EB, Rizvi NA, Hui R, et al. Pembrolizumab for the treatment of non-small-cell lung cancer. *N Engl J Med.* 2015;372(21):2018-2028.
39. Postow MA, Chesney J, Pavlick AC, et al. Nivolumab and ipilimumab versus ipilimumab in untreated melanoma. *N Engl J Med.* 2015;372(21):2006-2017.
40. Brahmer J, Reckamp KL, Baas P, et al. Nivolumab versus docetaxel in advanced squamous-cell non-small-cell lung cancer. *N Engl J Med.* 2015;373(2):123-135.
41. Weber JS, D'Angelo SP, Minor D, et al. Nivolumab versus chemotherapy in patients with advanced melanoma who progressed after anti-CTLA-4 treatment (CheckMate 037): A randomised, controlled, open-label, phase 3 trial. *Lancet Oncol.* 2015;16(4):375-384.

42. Robert C, Ribas A, Wolchok JD, et al. Anti-programmed-death-receptor-1 treatment with pembrolizumab in ipilimumab-refractory advanced melanoma: A randomised dose-comparison cohort of a phase 1 trial. *Lancet*. 2014;384(9948):1109-1117.
43. Eggermont AMM, Suci S, Testori A, et al. Long-term results of the randomized phase III trial EORTC 18991 of adjuvant therapy with pegylated interferon alfa-2b versus observation in resected stage III melanoma. *J Clin Oncol*. 2012;30(31):3810-3818.
44. McDermott D, Haanen J, Chen TT, Lorigan P, O'Day S, Investigators MDX. Efficacy and safety of ipilimumab in metastatic melanoma patients surviving more than 2 years following treatment in a phase III trial (MDX010-20). *Ann Oncol*. 2013;24(10):2694-2698.
45. Cella D, Grünwald V, Escudier B, et al. Patient-reported outcomes of patients with advanced renal cell carcinoma treated with nivolumab plus ipilimumab versus sunitinib (CheckMate 214): a randomised, phase 3 trial. *Lancet Oncol*. 2019;20(2):297-310.
46. Hui R, Ozguroglu M, Villegas A, et al. Patient-reported outcomes with durvalumab after chemoradiotherapy in stage III, unresectable non-small-cell lung cancer (PACIFIC): a randomised, controlled, phase 3 study. *Lancet Oncol*. 2019;20(12):1670-1680.
47. Laetsch TW, Myers GD, Baruchel A, et al. Patient-reported quality of life after tisagenlecleucel infusion in children and young adults with relapsed or refractory B-cell acute lymphoblastic leukaemia: a global, single-arm, phase 2 trial. *Lancet Oncol*. 2019;20(12):1710-1718.
48. Vaughn DJ, Bellmunt J, Fradet Y, et al. Health-Related Quality-of-Life Analysis From KEYNOTE-045: A Phase III Study of Pembrolizumab Versus Chemotherapy for Previously Treated Advanced Urothelial Cancer. *J Clin Oncol*. 2018;36(16):1579-1587.
49. Kaufman HL, Hunger M, Hennessy M, Schlichting M, Bharmal M. Nonprogression with avelumab treatment associated with gains in quality of life in metastatic Merkel cell carcinoma. *Future Oncol*. 2018;14(3):255-266.
50. von Tresckow B, Fanale M, Ardeshtna KM, et al. Patient-reported outcomes in KEYNOTE-087, a phase 2 study of pembrolizumab in patients with classical Hodgkin lymphoma. *Leuk Lymphoma*. 2019;60(11):2705-2711.
51. Harrington KJ, Ferris RL, Blumenschein G, et al. Nivolumab versus standard, single-agent therapy of investigator's choice in recurrent or metastatic squamous cell carcinoma of the head and neck (CheckMate 141): health-related quality-of-life results from a randomised, phase 3 trial. *Lancet Oncol*. 2017;18(8):1104-1115.
52. Brahmer JR, Rodríguez-Abreu D, Robinson AG, et al. Health-related quality-of-life results for pembrolizumab versus chemotherapy in advanced, PD-L1-positive NSCLC (KEYNOTE-024): a multicentre, international, randomised, open-label phase 3 trial. *Lancet Oncol*. 2017;18(12):1600-1609.
53. Barlesi F, Garon EB, Kim D-W, et al. Health-Related Quality of Life in KEYNOTE-010: a Phase II/III Study of Pembrolizumab Versus Docetaxel in Patients With Previously Treated Advanced, Programmed Death Ligand 1-Expressing NSCLC. *J Thorac Oncol*. 2019;14(5):793-801.
54. Bordoni R, Ciardiello F, von Pawel J, et al. Patient-Reported Outcomes in OAK: A Phase III Study of Atezolizumab Versus Docetaxel in Advanced Non-Small-cell Lung Cancer. *Clin Lung Cancer*. 2018;19(5):441-449.e444.
55. Cella D, Grünwald V, Nathan P, et al. Quality of life in patients with advanced renal cell carcinoma given nivolumab versus everolimus in CheckMate 025: a randomised, open-label, phase 3 trial. *Lancet Oncol*. 2016;17(7):994-1003.
56. Coens C, Suci S, Chiarion-Sileni V, et al. Health-related quality of life with adjuvant ipilimumab versus placebo after complete resection of high-risk stage III melanoma (EORTC 18071): secondary outcomes of a multinational, randomised, double-blind, phase 3 trial. *Lancet Oncol*. 2017;18(3):393-403.
57. Reck M, Brahmer J, Bennett B, et al. Evaluation of health-related quality of life and symptoms in patients with advanced non-squamous non-small cell lung cancer treated with nivolumab or docetaxel in CheckMate 057. *Eur J Cancer*. 2018;102:23-30.
58. Reck M, Taylor F, Penrod JR, et al. Impact of Nivolumab versus Docetaxel on Health-Related Quality of Life and Symptoms in Patients with Advanced Squamous Non-Small Cell Lung Cancer: Results from the CheckMate 017 Study. *J Thorac Oncol*. 2018;13(2):194-204.
59. Bottomley A, Coens C, Suci S, et al. Adjuvant therapy with pegylated interferon alfa-2b versus observation in resected stage III melanoma: A phase III randomized controlled trial of health-related quality of life and symptoms by the European Organisation for Research and Treatment of Cancer. *J Clin Oncol*. 2009;27(18):2916-2923.

60. Revicki DA, van den Eertwegh AJ, Lorigan P, et al. Health related quality of life outcomes for unresectable stage III or IV melanoma patients receiving ipilimumab treatment. *Health Qual Life Outcomes*. 2012;10:66.

Supplementary Table 1. Coding template: overview of all quality-assessment criteria

| LABEL                                      | EXPLANATION                                                                                                                                                                                                                                                                                                                                                              | CODES                                                                                                                                                   |
|--------------------------------------------|--------------------------------------------------------------------------------------------------------------------------------------------------------------------------------------------------------------------------------------------------------------------------------------------------------------------------------------------------------------------------|---------------------------------------------------------------------------------------------------------------------------------------------------------|
| General trial description                  |                                                                                                                                                                                                                                                                                                                                                                          |                                                                                                                                                         |
| ID                                         | Original identification number of the clinical trial                                                                                                                                                                                                                                                                                                                     | Open ended (Number)                                                                                                                                     |
| NCT number                                 | NCT number of the clinical trial leading to FDA approval                                                                                                                                                                                                                                                                                                                 | Open ended (Nominal)                                                                                                                                    |
| Drug name                                  | Pharmaceutical and commercial drug name                                                                                                                                                                                                                                                                                                                                  | Open ended (Nominal)                                                                                                                                    |
| Approval date                              | Year of the FDA approval                                                                                                                                                                                                                                                                                                                                                 | Open ended (Year)                                                                                                                                       |
| Approval type                              | The type of approval received for the drug was:<br>Regular: Drug received regular FDA approval<br>Accelerated: Drug received accelerated FDA approval                                                                                                                                                                                                                    | <ul style="list-style-type: none"> <li>- Regular</li> <li>- Accelerated</li> </ul>                                                                      |
| Approval indication – Line of therapy      | Line of therapy in specific diagnosis<br>First line: The drug was approved as first line treatment<br>Second line: The drug was approved as second line treatment<br>End of line: The drug was approved as end of line treatment<br>Adjuvant: The drug was approved as adjuvant treatment<br>Maintenance: The drug was approved as maintenance treatment                 | <ul style="list-style-type: none"> <li>- First line</li> <li>- Second line</li> <li>- End of line</li> <li>- Adjuvant</li> <li>- Maintenance</li> </ul> |
| Approval indication – Alone or combination | FDA approval for the I-O drug alone or in combination:<br>Alone: I-O drug was approved alone<br>Combination: I-O drug was approved in combination with another agent                                                                                                                                                                                                     | <ul style="list-style-type: none"> <li>- Alone</li> <li>- Combination</li> </ul>                                                                        |
| First author                               | Last name of the first author of the clinical trial publication                                                                                                                                                                                                                                                                                                          | Open ended                                                                                                                                              |
| Year                                       | Year of publication                                                                                                                                                                                                                                                                                                                                                      | Open ended (Year)                                                                                                                                       |
| Journal name                               | Name of the journal that published the primary manuscript                                                                                                                                                                                                                                                                                                                | Open ended (Nominal)                                                                                                                                    |
| Journal impact factor                      | Impact factor of the journal that published the primary manuscript                                                                                                                                                                                                                                                                                                       | Open ended (Number)                                                                                                                                     |
| Manuscript type                            | Type of manuscript based on the outcomes that the article focuses on (clinical outcomes, PRO outcomes or both)<br>Clinical trial: Article that reports clinical outcomes without PRO results<br>PRO: Article that focuses on the PRO results, usually a secondary publication of the clinical trial<br>Both: Article that reports both clinical outcomes and PRO results | <ul style="list-style-type: none"> <li>- Clinical trial</li> <li>- PRO</li> <li>- Both</li> </ul>                                                       |
| Full clinical trial protocol               | Full clinical trial protocol available either in NCT or on the journal's website<br>Yes: The full clinical trial protocol was available<br>No: The full clinical trial protocol was not available                                                                                                                                                                        | <ul style="list-style-type: none"> <li>- Yes</li> <li>- No</li> </ul>                                                                                   |

|                           |                                                                                                                                                                                                                                                                                                                                                                                                      |                                                                                                                                                                        |
|---------------------------|------------------------------------------------------------------------------------------------------------------------------------------------------------------------------------------------------------------------------------------------------------------------------------------------------------------------------------------------------------------------------------------------------|------------------------------------------------------------------------------------------------------------------------------------------------------------------------|
| Phase                     | Phase of the clinical trial<br>Phase I: The clinical trial was a phase I trial<br>Phase II: The clinical trial was a phase II trial<br>Phase I/II: The clinical trial was a phase I/II trial<br>Phase III: The clinical trial was a phase III trial                                                                                                                                                  | <ul style="list-style-type: none"> <li>- Phase I</li> <li>- Phase II</li> <li>- Phase I/II</li> <li>- Phase III</li> </ul>                                             |
| Randomization status      | Type of clinical trial<br>Non-randomized: The clinical trial was not randomized<br>Randomized: The clinical trial was randomized                                                                                                                                                                                                                                                                     | <ul style="list-style-type: none"> <li>- Non-randomized</li> <li>- Randomized</li> </ul>                                                                               |
| Type of tumor             | The type of tumor investigated in the clinical trial                                                                                                                                                                                                                                                                                                                                                 | Open ended (Nominal)                                                                                                                                                   |
| Treatment arms            | The number of treatment arms included in the clinical trial<br>Single arm: The clinical trial was a single-arm study<br>Multiple arm: The clinical trial was a multiple-arm study                                                                                                                                                                                                                    | <ul style="list-style-type: none"> <li>- Single arm</li> <li>- Multiple arm</li> </ul>                                                                                 |
| Sample size               | Number of enrolled patients                                                                                                                                                                                                                                                                                                                                                                          | Open ended (Number)                                                                                                                                                    |
| Publication date          | Publication date of the primary manuscript                                                                                                                                                                                                                                                                                                                                                           | Open ended (MM/DD/YYYY)                                                                                                                                                |
| Pubmed search results PRO | Number of PubMed results received using the keywords for PRO search: "quality of life[MeSH Terms] OR quality of life[Text Word] OR patient reported outcomes[Text Word] AND specific drug name[Text Word]"                                                                                                                                                                                           | Open ended (Number)                                                                                                                                                    |
| PRO first author          | Last name of the first author of the PRO publication                                                                                                                                                                                                                                                                                                                                                 | Open ended (Nominal)                                                                                                                                                   |
| PRO pub date              | Date of publication of the PRO results                                                                                                                                                                                                                                                                                                                                                               | Open ended (MM/DD/YYYY)                                                                                                                                                |
| Journal name              | Name of the journal that published the PRO manuscript                                                                                                                                                                                                                                                                                                                                                | Open ended (Nominal)                                                                                                                                                   |
| Journal impact factor     | Impact factor of the journal that published the PRO manuscript                                                                                                                                                                                                                                                                                                                                       | Open ended (Number)                                                                                                                                                    |
| Limitations               | The authors stated the limitations of the study<br>Yes: The authors stated the limitations of the study<br>No: The authors did not state the limitations of the study<br>Not available: No PRO results published                                                                                                                                                                                     | <ul style="list-style-type: none"> <li>- Yes</li> <li>- No</li> <li>- Not Available (no PRO)</li> </ul>                                                                |
| PRO conclusion            | PRO conclusion (compared to control arm or standard of care)<br>Superior: Experimental arm is superior to control arm or standard of care<br>Similar outcomes: Similar outcomes to control arm or standard of care<br>Inferior: Experimental arm is inferior to control arm or standard of care<br>Not reported: No conclusion in the manuscript reported<br>Not available: No PRO results published | <ul style="list-style-type: none"> <li>- Superior</li> <li>- Similar outcomes</li> <li>- Inferior</li> <li>- Not reported</li> <li>- Not available (no PRO)</li> </ul> |

| Reporting of specific hypothesis and research objectives |                                                                                                                                                                                                                                                                                                                                                                                                                                                                                                               |                                                                                                                                                                |
|----------------------------------------------------------|---------------------------------------------------------------------------------------------------------------------------------------------------------------------------------------------------------------------------------------------------------------------------------------------------------------------------------------------------------------------------------------------------------------------------------------------------------------------------------------------------------------|----------------------------------------------------------------------------------------------------------------------------------------------------------------|
| PRO hypothesis                                           | <p>The extent to which the PRO research question is specified in the introduction of the article or the protocol of the clinical trial:</p> <p>None: No PRO hypotheses stated</p> <p>Specific: The direction of the PRO hypothesis is stated with the domain of interest and the time frame/amount of change</p> <p>Broad: The PRO hypothesis is stated broadly (no direction of the hypothesis, domains of interest, time frame, and/or amount of change)</p> <p>Not available: No PRO results published</p> | <ul style="list-style-type: none"> <li>- None</li> <li>- Specific</li> <li>- Broad</li> <li>- Not Available (no PRO)</li> </ul>                                |
| PRO endpoint                                             | <p>The type of endpoint of the PRO outcome:</p> <p>Primary: The PRO outcome is reported as primary endpoint of the article</p> <p>Secondary: The PRO outcome is reported as secondary endpoint in the article</p> <p>Exploratory: The PRO outcome is reported as an exploratory endpoint in the article</p> <p>Uncertain: It is not clear from the article what type of endpoint the PRO outcome is</p> <p>Not available: No PRO results published</p>                                                        | <ul style="list-style-type: none"> <li>- Primary</li> <li>- Secondary</li> <li>- Exploratory</li> <li>- Uncertain</li> <li>- Not Available (no PRO)</li> </ul> |
| PRO instruments                                          |                                                                                                                                                                                                                                                                                                                                                                                                                                                                                                               |                                                                                                                                                                |
| PRO instrument                                           | List all the instruments that were used to measure the PRO outcome                                                                                                                                                                                                                                                                                                                                                                                                                                            | <ul style="list-style-type: none"> <li>- Open ended (Nominal)</li> <li>- Not Available (no PRO)</li> </ul>                                                     |
| PRO instrument validity                                  | <p>The PRO instruments used were referenced and cited in the manuscript</p> <p>Yes: The PRO instruments used were referenced and cited in the manuscript</p> <p>No: The PRO instruments used were not referenced and cited in the manuscript</p> <p>Not available: No PRO results published</p>                                                                                                                                                                                                               | <ul style="list-style-type: none"> <li>- Yes</li> <li>- No</li> <li>- Not Available (no PRO)</li> </ul>                                                        |
| Planned schedule of questionnaires administration        | The planned schedule of questionnaire administration of the PRO instruments                                                                                                                                                                                                                                                                                                                                                                                                                                   | <ul style="list-style-type: none"> <li>- Open ended (Nominal)</li> <li>- Not Available (no PRO)</li> </ul>                                                     |



|                       |                                                                                                                                                                                                                                                                                                                                                                                                                      |                                                                                                                                                                  |
|-----------------------|----------------------------------------------------------------------------------------------------------------------------------------------------------------------------------------------------------------------------------------------------------------------------------------------------------------------------------------------------------------------------------------------------------------------|------------------------------------------------------------------------------------------------------------------------------------------------------------------|
| Baseline PRO          | <p>Did the article include a baseline assessment?</p> <p>Yes: There was report of a baseline PRO assessment</p> <p>No: There was no baseline PRO assessment</p> <p>Not reported/unclear: There was no clear report of baseline PRO assessment</p> <p>Not available: No PRO results published</p>                                                                                                                     | <ul style="list-style-type: none"> <li>- Yes</li> <li>- No</li> <li>- Not reported/unclear</li> <li>- Not Available (no PRO)</li> </ul>                          |
| PRO collection method | <p>Method of collecting PRO data from participant</p> <p>Paper: PRO data were collected using paper questionnaires</p> <p>Electronic: PRO data were collected using electronic devices</p> <p>Combination: PRO data were collected using both paper questionnaires and electronic devices</p> <p>Not reported: PRO data collection method was not reported</p> <p>Not available: No PRO results published</p>        | <ul style="list-style-type: none"> <li>- Paper</li> <li>- Electronic</li> <li>- Combination</li> <li>- Not reported</li> <li>- Not Available (no PRO)</li> </ul> |
| PRO site specific     | <p>The PRO instruments used were cancer site specific</p> <p>Yes: PRO instruments used were cancer site specific</p> <p>No: PRO instruments used were not cancer site specific</p> <p>Not available: No PRO results published</p>                                                                                                                                                                                    | <ul style="list-style-type: none"> <li>- Yes</li> <li>- No</li> <li>- Not Available (no PRO)</li> </ul>                                                          |
| PRO dimensions        | <p>Targeted PRO dimensions:</p> <p>Single scale/dimension: PRO instruments were unidimensional</p> <p>Multiple scales/dimension: PRO instruments were multidimensional</p> <p>Not available: No PRO results published</p>                                                                                                                                                                                            | <ul style="list-style-type: none"> <li>- Single scale/dimension</li> <li>- Multiple scales/dimensions</li> <li>- Not Available (no PRO)</li> </ul>               |
| Follow-up measures    | <p>Were two or more follow-up measures included in the primary PRO analysis?</p> <p>Yes: Two or more follow-up assessments included in primary PRO analysis</p> <p>No: Only one follow-up assessment included in primary PRO analysis</p> <p>Not reported: Number of follow-up assessments included in primary PRO analysis not reported/unclear from the article</p> <p>Not available: No PRO results published</p> | <ul style="list-style-type: none"> <li>- Yes</li> <li>- No</li> <li>- Not reported/unclear</li> <li>- Not Available (no PRO)</li> </ul>                          |

| Clinical relevance           |                                                                                                                                                                                                                                                                                     |                                                                                                                                                                                                 |
|------------------------------|-------------------------------------------------------------------------------------------------------------------------------------------------------------------------------------------------------------------------------------------------------------------------------------|-------------------------------------------------------------------------------------------------------------------------------------------------------------------------------------------------|
| Clinical relevance           | The reported threshold for minimal clinically important difference, expressed either as a:<br>Difference of X points: Clinical relevance was evaluated as a between-arms difference<br>Change of X points: Clinical relevance was evaluated as a change within-person or within-arm | <ul style="list-style-type: none"> <li>- Change of X points from baseline</li> <li>- Difference of X points between 2 arms</li> <li>- Not reported</li> <li>- Not Available (no PRO)</li> </ul> |
| Clinical relevance justified | Was the clinical relevance defined and cited in the manuscript?<br>Yes: The clinical relevance was defined and a reference was cited<br>No: The clinical relevance was not defined and no reference was cited<br>Not available: No PRO results published                            | <ul style="list-style-type: none"> <li>- Yes</li> <li>- No</li> <li>- Not Available (no PRO)</li> </ul>                                                                                         |
| Statistical analysis         |                                                                                                                                                                                                                                                                                     |                                                                                                                                                                                                 |
| Primary statistical method   | Main statistical method that was used for the primary analysis of the PRO endpoint                                                                                                                                                                                                  | <ul style="list-style-type: none"> <li>- Open ended (Nominal)</li> <li>- Not Available (no PRO)</li> </ul>                                                                                      |

|                                  |                                                                                                                                                                                                                                                                                                                                                                                                                                                                                        |                                                                                                                                                            |
|----------------------------------|----------------------------------------------------------------------------------------------------------------------------------------------------------------------------------------------------------------------------------------------------------------------------------------------------------------------------------------------------------------------------------------------------------------------------------------------------------------------------------------|------------------------------------------------------------------------------------------------------------------------------------------------------------|
| Type I error                     | <p>Was a procedure to control for type I error needed in the primary PRO analysis?</p> <p>Not needed: Control for type I error not necessary because primary PRO analysis was on a single time point and single dimension or used longitudinal analysis for a single dimension.</p> <p>Needed and done: Control for type I error was needed AND done</p> <p>Needed but not done: Control for type I error was needed, but not done.</p> <p>Not available: No PRO results published</p> | <ul style="list-style-type: none"> <li>- Not needed</li> <li>- Needed and done</li> <li>- Needed but not done</li> <li>- Not Available (no PRO)</li> </ul> |
| Groups baseline PRO              | <p>Were treatment groups compared for PRO scores at baseline?</p> <p>Yes: A comparison of PRO scores at baseline between the treatment arms was made in the article</p> <p>No: There was no comparison of PRO scores at baseline between the treatment arms</p> <p>NA: Not applicable because clinical trial was single arm</p> <p>Not available: No PRO results published</p>                                                                                                         | <ul style="list-style-type: none"> <li>- Yes</li> <li>- No</li> <li>- N/A</li> <li>- Not Available (no PRO)</li> </ul>                                     |
| Completion/Compliance rate       | <p>Were treatment arms compared for completion/compliance rates during the follow-up assessments?</p> <p>Yes: Compliance rates for the PRO follow-up assessments were reported per arm</p> <p>No: Compliance rates for the PRO follow-up assessments were not reported per arm</p> <p>Not available: No PRO results published</p>                                                                                                                                                      | <ul style="list-style-type: none"> <li>- Yes</li> <li>- No</li> <li>- Not Available (no PRO)</li> </ul>                                                    |
| Completion/Compliance rate table | <p>Did the authors provide a table summarizing completion/compliance rates for all arms and all time points?</p> <p>Yes: A compliance rates table was provided</p> <p>No: A compliance rates table was not provided</p> <p>Not available: No PRO results published</p>                                                                                                                                                                                                                 | <ul style="list-style-type: none"> <li>- Yes</li> <li>- No</li> <li>- Not Available (no PRO)</li> </ul>                                                    |

|                       |                                                                                                                                                                                                                                                                                                                                                                                                                                                                                                                                                                                                                                                                                                                                                                                   |                                                                                                                                                                                                               |
|-----------------------|-----------------------------------------------------------------------------------------------------------------------------------------------------------------------------------------------------------------------------------------------------------------------------------------------------------------------------------------------------------------------------------------------------------------------------------------------------------------------------------------------------------------------------------------------------------------------------------------------------------------------------------------------------------------------------------------------------------------------------------------------------------------------------------|---------------------------------------------------------------------------------------------------------------------------------------------------------------------------------------------------------------|
| Dataset PRO analysis  | <p>The dataset that is used for the PRO main analysis was defined as:</p> <p>ITT: The intent-to-treat population</p> <p>mITT: A modified intent-to-treat population (mITT)</p> <p>Other 1: Patients with a baseline assessment and at least one post-baseline assessment</p> <p>Other 2: Patients who received at least one dose of study medication and completed at least one assessment.</p> <p>Other 3: ITT population with non-missing baseline measurements</p> <p>Unclear: Confusion arises from the article on what analysis population was used for primary analysis.</p> <p>Not reported: The analysis population for primary analysis was not reported and could not be deduced from the methodology/result section</p> <p>Not available: No PRO results published</p> | <ul style="list-style-type: none"> <li>- ITT</li> <li>- mITT</li> <li>- Other 1</li> <li>- Other 2</li> <li>- Other 3</li> <li>- Unclear</li> <li>- Not reported</li> <li>- Not Available (no PRO)</li> </ul> |
| Race ethnicity PRO    | <p>Manuscript reported on significant difference in PROs based on race and ethnicity of participants</p> <p>Yes: Manuscript reported on significant difference in PROs based on race and ethnicity of participants</p> <p>No: Manuscript did not report on significant difference in PROs based on race and ethnicity of participants</p> <p>Not available: No PRO results published</p>                                                                                                                                                                                                                                                                                                                                                                                          | <ul style="list-style-type: none"> <li>- Yes</li> <li>- No</li> <li>- Not Available (no PRO)</li> </ul>                                                                                                       |
| Handling missing data |                                                                                                                                                                                                                                                                                                                                                                                                                                                                                                                                                                                                                                                                                                                                                                                   |                                                                                                                                                                                                               |
| Missing data PRO      | <p>Manuscript reported approach for dealing with missing PRO assessments.</p> <p>Yes: Manuscript reported approach for dealing with missing PRO assessments</p> <p>No: Manuscript did not report approach for dealing with missing PRO assessments</p> <p>Not available: No PRO results published</p>                                                                                                                                                                                                                                                                                                                                                                                                                                                                             | <ul style="list-style-type: none"> <li>- Yes</li> <li>- No</li> <li>- Not Available (no PRO)</li> </ul>                                                                                                       |
| Reasons missing PRO   | <p>The authors provided details on the reasons that led to missing PRO data by timepoint</p> <p>Yes: The authors provided details on the reasons that led to missing PRO data</p>                                                                                                                                                                                                                                                                                                                                                                                                                                                                                                                                                                                                 | <ul style="list-style-type: none"> <li>- Yes</li> <li>- No</li> <li>- Not Available (no PRO)</li> </ul>                                                                                                       |

|  |                                                                                                                         |  |
|--|-------------------------------------------------------------------------------------------------------------------------|--|
|  | No: The authors provided details on the reasons that led to missing PRO data<br>Not available: No PRO results published |  |
|--|-------------------------------------------------------------------------------------------------------------------------|--|

Abbreviations: FDA, Food and Drug Administration; I-O, immune-oncology; PRO, patient-reported outcomes.

Supplementary Table 2. Characteristics of individual clinical trials leading to drug approvals and of their corresponding PRO publications.

| Information on clinical trials |             |                          |                                                         |                          |                          |               |                                               |                                           |                                              |                                            |                    |                        |                          |                           |
|--------------------------------|-------------|--------------------------|---------------------------------------------------------|--------------------------|--------------------------|---------------|-----------------------------------------------|-------------------------------------------|----------------------------------------------|--------------------------------------------|--------------------|------------------------|--------------------------|---------------------------|
| ID                             | NCT Number  | First author             | Pharmaceutical drug name                                | Cancer Type              | Approval date (mm/dd/yy) | Approval type | Year of publication of the primary manuscript | Journal publishing the primary manuscript | Journal impact factor at time of publication | Clinical trial publication date (mm/dd/yy) | Published PRO data | Publication type       | Total number of patients | PubMed search results PRO |
| 1                              | NCT02267603 | Nghiem P <sup>1</sup>    | Pembrolizumab                                           | Merkel cell carcinoma    | 12/19/18                 | Accelerated   | 2019                                          | Journal of Clinical Oncology              | 28.35                                        | 2/6/19                                     | No                 | Clinical outcomes only | 50                       | 71                        |
| 2                              | NCT02366143 | Socinski MA <sup>2</sup> | Atezolizumab                                            | NSCLC                    | 12/6/18                  | Regular       | 2018                                          | The New England Journal of Medicine       | 70.67                                        | 6/4/18                                     | No                 | Clinical outcomes only | 1202                     | 18                        |
| 3                              | NCT02702414 | Zhu A <sup>3</sup>       | Pembrolizumab                                           | Hepatocellular carcinoma | 11/9/18                  | Accelerated   | 2018                                          | The Lancet Oncology                       | 35.38                                        | 6/3/18                                     | No                 | Clinical outcomes only | 104                      | 71                        |
| 4                              | NCT02775435 | Paz-Ares L <sup>4</sup>  | Pembrolizumab + Carboplatin + Paclitaxel/nab-paclitaxel | NSCLC                    | 10/30/18                 | Regular       | 2018                                          | The New England Journal of                | 70.67                                        | 9/25/18                                    | No                 | Clinical outcomes only | 559                      | 71                        |

|   |                |                         |                                       |                                   |         |             |      |                                     |       |          |     |                                                          |     |     |
|---|----------------|-------------------------|---------------------------------------|-----------------------------------|---------|-------------|------|-------------------------------------|-------|----------|-----|----------------------------------------------------------|-----|-----|
|   |                |                         |                                       |                                   |         |             |      | Medicine                            |       |          |     |                                                          |     |     |
| 5 | R2810-ONC-1540 | Migden M <sup>5</sup>   | Cemiplimab-rwlc                       | Cutaneous squamous cell carcinoma | 9/28/18 | Regular     | 2018 | The New England Journal of Medicine | 70.67 | 6/4/18   | No  | Clinical outcomes only                                   | 85  | 1   |
| 6 | NCT02578680    | Gandhi L <sup>6</sup>   | Pembrolizumab + pemetrexed + platinum | NSCLC                             | 8/20/18 | Regular     | 2018 | The New England Journal of Medicine | 70.67 | 4/16/18  | No  | Clinical outcomes only                                   | 616 | 72  |
| 7 | NCT01928394    | Ready N <sup>7</sup>    | Nivolumab                             | SCLC                              | 8/16/18 | Accelerated | 2018 | Journal of Thoracic Oncology        | 12.4  | 10/10/18 | No  | Clinical outcomes only                                   | 109 | 112 |
| 8 | NCT02060188    | Overman MJ <sup>8</sup> | Ipilimumab + Nivolumab                | Colorectal adenocarcinoma         | 7/10/18 | Accelerated | 2018 | Journal of Clinical Oncology        | 28.35 | 01/20/18 | Yes | Clinical outcomes and PRO results in the same manuscript | 119 | 74  |
| 9 | NCT02576990    | Armand P <sup>9</sup>   | Pembrolizumab                         | Large B-cell lymphoma             | 6/13/18 | Accelerated | 2018 | Blood                               | 16.6  | 11/21/18 | No  | Clinical outcomes only                                   | 53  | 72  |

|    |             |                           |                        |                       |          |         |      |                                     |       |         |     |                                               |      |     |
|----|-------------|---------------------------|------------------------|-----------------------|----------|---------|------|-------------------------------------|-------|---------|-----|-----------------------------------------------|------|-----|
| 10 | NCT02628067 | Chung HC <sup>10</sup>    | Pembroli zumab         | Cervical cancer       | 6/12/18  | Regular | 2018 | Journal of Clinical Oncology        | 28.35 | 6/1/18  | No  | Clinical outcomes only                        | 98   | 72  |
| 11 | NCT02445248 | Schuster SJ <sup>11</sup> | Tisagenlecleucel       | Large B-cell lymphoma | 5/1/18   | Regular | 2018 | The New England Journal of Medicine | 70.67 | 1/12/18 | No  | Clinical outcomes only                        | 165  | 3   |
| 12 | NCT02231749 | Motzer RJ <sup>12</sup>   | Ipilimumab + Nivolumab | Renal cell carcinoma  | 4/16/18  | Regular | 2018 | The New England Journal of Medicine | 70.67 | 4/5/18  | Yes | PRO results in a secondary manuscript         | 1096 | 36  |
| 13 | NCT02125461 | Antonia SJ <sup>13</sup>  | Durvalumab             | NSCLC                 | 2/16/18  | Regular | 2017 | The New England Journal of Medicine | 79.26 | 9/8/17  | Yes | PRO results in a secondary manuscript         | 713  | 10  |
| 14 | NCT02388906 | Weber J <sup>14</sup>     | Nivolumab              | Melanoma              | 12/20/17 | Regular | 2017 | The New England Journal of Medicine | 79.26 | 9/10/17 | Yes | Clinical outcomes and PRO results in the same | 906  | 112 |



|    |                 |                                     |                                |                                                                            |              |                 |      |                                                             |       |              |     |                                                                                           |     |     |
|----|-----------------|-------------------------------------|--------------------------------|----------------------------------------------------------------------------|--------------|-----------------|------|-------------------------------------------------------------|-------|--------------|-----|-------------------------------------------------------------------------------------------|-----|-----|
|    |                 |                                     |                                |                                                                            |              |                 |      |                                                             |       |              |     | manu<br>script                                                                            |     |     |
| 15 | NCT02<br>348216 | Neelapu<br>S <sup>15</sup>          | Axicabta<br>gene<br>ciloleucel | Large<br>B-cell<br>lympho<br>ma                                            | 10/18/<br>18 | Regular         | 2017 | The<br>New<br>Englan<br>d<br>Journa<br>l of<br>Medici<br>ne | 79.26 | 12/10/<br>17 | No  | Clinic<br>al<br>outco<br>mes<br>only                                                      | 109 | 0   |
| 16 | NCT01<br>658878 | Ei-<br>Khoueiry<br>AB <sup>16</sup> | Nivoluma<br>b                  | Hepato<br>cellular<br>carcino<br>ma                                        | 9/22/1<br>7  | Acceler<br>ated | 2017 | The<br>Lancet                                               | 23.25 | 04/20/<br>17 | Yes | Clinic<br>al<br>outco<br>mes<br>and<br>PRO<br>results<br>in the<br>same<br>manu<br>script | 262 | 112 |
| 17 | NCT02<br>335411 | Fuchs<br>C <sup>17</sup>            | Pembroli<br>zumab              | Gastric/<br>Gastro<br>esopha<br>geal<br>junction<br>adenoc<br>arcino<br>ma | 9/22/1<br>7  | Acceler<br>ated | 2018 | JAMA<br>Oncolo<br>gy                                        | 22.4  | 5/10/1<br>8  | No  | Clinic<br>al<br>outco<br>mes<br>only                                                      | 259 | 72  |
| 18 | NCT02<br>435849 | Maude<br>SL <sup>18</sup>           | Tisagenl<br>eucleucel          | Acute<br>lympho<br>blastic<br>leukemi<br>a                                 | 8/30/1<br>7  | Regular         | 2018 | The<br>New<br>Englan<br>d<br>Journa<br>l of<br>Medici<br>ne | 79.26 | 2/1/18       | Yes | PRO<br>results<br>in a<br>secon<br>dary<br>manu<br>script                                 | 92  | 3   |
| 19 | NCT02<br>060188 | Overman<br>M <sup>19</sup>          | Nivoluma<br>b                  | Colorec<br>tral<br>adenoc                                                  | 7/31/1<br>7  | Acceler<br>ated | 2017 | The<br>Lancet                                               | 36.42 | 7/19/1<br>7  | Yes | Clinic<br>al<br>outco                                                                     | 74  | 112 |

|    |                 |                             |                                                            |                                 |             |                 |      |                                                           |       |              |     |                                                                  |     |    |
|----|-----------------|-----------------------------|------------------------------------------------------------|---------------------------------|-------------|-----------------|------|-----------------------------------------------------------|-------|--------------|-----|------------------------------------------------------------------|-----|----|
|    |                 |                             |                                                            | arcino<br>ma                    |             |                 |      | Oncolo<br>gy                                              |       |              |     | mes<br>and<br>PRO<br>results<br>in the<br>same<br>manu<br>script |     |    |
| 20 | NCT02<br>256436 | Bellmunt<br>J <sup>20</sup> | Pembroli<br>zumab                                          | Urotheli<br>al<br>carcino<br>ma | 5/18/1<br>7 | Regular         | 2017 | Journa<br>l of<br>Clinica<br>l<br>Oncolo<br>gy            | 26.36 | 2/17/1<br>7  | Yes | PRO<br>results<br>in a<br>secon<br>dary<br>manu<br>script        | 542 | 72 |
| 21 | NCT02<br>039674 | Langer<br>C <sup>21</sup>   | Pembroli<br>zumab +<br>pemetrex<br>ed +<br>carboplat<br>in | NSCLC                           | 5/10/1<br>7 | Acceler<br>ated | 2016 | The<br>Lancet<br>Oncolo<br>gy                             | 33.9  | 10/10/<br>16 | No  | Clinic<br>al<br>outco<br>mes<br>only                             | 123 | 72 |
| 22 | NCT01<br>772004 | Patel<br>MR <sup>22</sup>   | Aveluma<br>b                                               | Urotheli<br>al<br>carcino<br>ma | 4/9/17      | Acceler<br>ated | 2017 | The<br>Lancet<br>Oncolo<br>gy                             | 36.42 | 12/5/1<br>7  | No  | Clinic<br>al<br>outco<br>mes<br>only                             | 249 | 8  |
| 23 | NCT01<br>693562 | Powles<br>T <sup>23</sup>   | Durvalu<br>mab                                             | Urotheli<br>al<br>carcino<br>ma | 5/1/17      | Acceler<br>ated | 2017 | JAMA<br>Oncolo<br>gy                                      | 22.4  | 9/14/1<br>7  | No  | Clinic<br>al<br>outco<br>mes<br>only                             | 191 | 10 |
| 24 | NCT02<br>155647 | Kaufman<br>H <sup>24</sup>  | Aveluma<br>b                                               | Merkel<br>cell<br>carcino<br>ma | 4/23/1<br>7 | Acceler<br>ated | 2018 | Journa<br>l for<br>Immun<br>othera<br>py of<br>Cance<br>r | 8.3   | 1/19/1<br>8  | Yes | PRO<br>results<br>in a<br>secon<br>dary<br>manu<br>script        | 88  | 8  |
| 25 | NCT02<br>453594 | Chen R <sup>25</sup>        | Pembroli<br>zumab                                          | Hodgki<br>n                     | 3/14/1<br>7 | Acceler<br>ated | 2017 | Journa<br>l of                                            | 26.36 | 4/25/1<br>7  | Yes | PRO<br>results                                                   | 210 | 72 |

|       |             |                           |               |                      |          |             |      |                                     |       |          |     |                                       |      |     |
|-------|-------------|---------------------------|---------------|----------------------|----------|-------------|------|-------------------------------------|-------|----------|-----|---------------------------------------|------|-----|
|       |             |                           |               | lymphoma             |          |             |      | Clinical Oncology                   |       |          |     | in a secondary manuscript             |      |     |
| 26    | NCT02387996 | Sharma P <sup>26</sup>    | Nivolumab     | Urothelial carcinoma | 2/2/17   | Accelerated | 2017 | The Lancet Oncology                 | 36.42 | 1/26/17  | No  | Clinical outcomes only                | 270  | 112 |
| 27    | NCT02105636 | Ferris RL <sup>27</sup>   | Nivolumab     | SCCHN                | 11/10/16 | Regular     | 2016 | The New England Journal of Medicine | 72.4  | 10/8/16  | Yes | PRO results in a secondary manuscript | 361  | 112 |
| 28-a* | NCT02142738 | Reck M <sup>28</sup>      | Pembrolizumab | NSCLC                | 10/24/16 | Regular     | 2016 | The New England Journal of Medicine | 72.4  | 10/8/16  | Yes | PRO results in a secondary manuscript | 305  | 72  |
| 28-b* | NCT01905657 | Herbst R <sup>29</sup>    | Pembrolizumab | NSCLC                | 10/24/16 | Regular     | 2015 | The Lancet                          | 47.8  | 12/19/15 | Yes | PRO results in a secondary manuscript | 1034 | 72  |
| 29-at | NCT02008227 | Rittmeyer A <sup>30</sup> | Atezolizumab  | NSCLC                | 10/18/16 | Regular     | 2016 | The Lancet                          | 47.8  | 12/13/16 | Yes | PRO results in a secondary manuscript | 850  | 18  |

|           |                 |                              |               |                      |              |             |      |                                     |       |             |     |                                                          |     |     |
|-----------|-----------------|------------------------------|---------------|----------------------|--------------|-------------|------|-------------------------------------|-------|-------------|-----|----------------------------------------------------------|-----|-----|
| 29-<br>b† | NCT01<br>903993 | Fehrenbacher L <sup>31</sup> | Atezolizumab  | NSCLC                | 10/18/<br>16 | Regular     | 2016 | The Lancet                          | 47.8  | 3/10/<br>16 | No  | Clinical outcomes only                                   | 287 | 18  |
| 30        | NCT01<br>848834 | Mehra R <sup>32</sup>        | Pembrolizumab | SCCHN                | 8/5/16       | Accelerated | 2018 | British Journal of Cancer           | 5.4   | 6/29/<br>18 | No  | Clinical outcomes only                                   | 192 | 72  |
| 31        | NCT02<br>108652 | Rosenberg JE <sup>33</sup>   | Atezolizumab  | Urothelial carcinoma | 5/18/<br>16  | Accelerated | 2016 | The Lancet                          | 47.8  | 3/6/16      | No  | Clinical outcomes only                                   | 311 | 18  |
| 32        | NCT02<br>181738 | Younes A <sup>34</sup>       | Nivolumab     | Hodgkin lymphoma     | 5/17/<br>16  | Accelerated | 2016 | The Lancet Oncology                 | 33.9  | 7/20/<br>16 | Yes | Clinical outcomes and PRO results in the same manuscript | 80  | 113 |
| 33        | NCT01<br>668784 | Motzer RJ <sup>35</sup>      | Nivolumab     | Renal cell carcinoma | 11/23/<br>15 | Regular     | 2015 | The New England Journal of Medicine | 59.55 | 9/25/<br>15 | Yes | PRO results in a secondary manuscript                    | 821 | 113 |
| 34        | NCT00<br>636168 | Eggermont A <sup>36</sup>    | Ipilimumab    | Melanoma             | 10/28/<br>15 | Regular     | 2015 | The Lancet Oncology                 | 26.5  | 3/31/<br>15 | Yes | PRO results in a secondary                               | 951 | 74  |

|    |                 |                             |                                   |              |                |                 |      |                                                                |       |             |     |                                                           |     |     |
|----|-----------------|-----------------------------|-----------------------------------|--------------|----------------|-----------------|------|----------------------------------------------------------------|-------|-------------|-----|-----------------------------------------------------------|-----|-----|
|    |                 |                             |                                   |              |                |                 |      |                                                                |       |             |     | manu<br>script                                            |     |     |
| 35 | NCT01<br>673867 | Borghaei<br>H <sup>37</sup> | Nivoluma<br>b                     | NSCLC        | 10/9/1<br>5    | Regular         | 2015 | The<br>New<br>Englan<br>d<br>Journa<br>l<br>of<br>Medici<br>ne | 59.55 | 9/27/1<br>5 | Yes | PRO<br>results<br>in a<br>secon<br>dary<br>manu<br>script | 582 | 113 |
| 36 | NCT01<br>295827 | Garon<br>E <sup>38</sup>    | Pembroli<br>zumab                 | NSCLC        | 10/2/1<br>5    | Acceler<br>ated | 2015 | The<br>New<br>Englan<br>d<br>Journa<br>l<br>of<br>Medici<br>ne | 59.55 | 4/19/1<br>5 | No  | Clinic<br>al<br>outco<br>mes<br>only                      | 495 | 72  |
| 37 | NCT01<br>927419 | Postow<br>MA <sup>39</sup>  | Ipilimum<br>ab +<br>Nivoluma<br>b | Melano<br>ma | 9/30/1<br>5    | Acceler<br>ated | 2015 | The<br>New<br>Englan<br>d<br>Journa<br>l<br>of<br>Medici<br>ne | 59.55 | 4/20/1<br>5 | No  | Clinic<br>al<br>outco<br>mes<br>only                      | 142 | 113 |
| 38 | NCT01<br>642004 | Brahmer<br>J <sup>40</sup>  | Nivoluma<br>b                     | NSCLC        | 03/04/<br>2015 | Regular         | 2015 | The<br>New<br>Englan<br>d<br>Journa<br>l<br>of<br>Medici<br>ne | 59.55 | 5/31/1<br>5 | Yes | PRO<br>results<br>in a<br>secon<br>dary<br>manu<br>script | 272 | 113 |
| 39 | NCT01<br>721746 | Weber<br>J <sup>41</sup>    | Nivoluma<br>b                     | Melano<br>ma | 12/22/<br>14   | Regular         | 2015 | The<br>Lancet<br>Oncolo<br>gy                                  | 26.5  | 3/18/1<br>5 | No  | Clinic<br>al<br>outco<br>mes<br>only                      | 405 | 113 |

| 40                      | NCT02252042              | Robert C <sup>42</sup>        | Pembroli zumab                      | Melano ma                                      | 9/4/14       | Acceler ated            | 2014                  | The Lancet                             | 45.2                          | 7/15/14                   | No                               | Clinic al outco mes only                  | 173                 | 72                           |
|-------------------------|--------------------------|-------------------------------|-------------------------------------|------------------------------------------------|--------------|-------------------------|-----------------------|----------------------------------------|-------------------------------|---------------------------|----------------------------------|-------------------------------------------|---------------------|------------------------------|
| 41                      | NCT00006249              | Eggermo nt A <sup>43</sup>    | Peginterf eron                      | Melano ma                                      | 3/29/11      | Regular                 | 2008                  | The Lancet                             | 38.27                         | 7/13/08                   | Yes                              | PRO results in a secon dary manu script   | 1256                | 199                          |
| 42                      | NCT00094653              | Hodi FS <sup>44</sup>         | Ipilimum ab                         | Melano ma                                      | 3/25/11      | Regular                 | 2010                  | The New Englan d Journa l of Medici ne | 53.29                         | 6/5/10                    | Yes                              | PRO results in a secon dary manu script   | 676                 | 1746                         |
| Information on PRO data |                          |                               |                                     |                                                |              |                         |                       |                                        |                               |                           |                                  |                                           |                     |                              |
| ID                      | First author             | PRO results publicati on date | Journal publishi ng the PRO results | Journ al impact factor at time of public ation | Endpoi nt    | Hypothe sis             | PRO instru ments      | PRO instru ment referen ced            | Primary statisti cal method s | Contr ol for type I error | Clinic al releva nce definiti on | Appro ach for dealin g with missin g data | Stud y limita tions | PRO conclu sion <sup>1</sup> |
| 8                       | Overm an MJ <sup>8</sup> | 01/20/2018                    | Journal of Clinical Oncolo gy       | 28.35                                          | Explorat ory | No hypothe sis reported | EORT C QLQ-C30, EQ-5D | Yes                                    | Linear mixed effects model    | Neede d but not done      | Chang e of X points              | Repor ted                                 | Not repor ted       | Impro veme nt in key PROs    |
| 12                      | Cella D <sup>45</sup>    | 1/15/19                       | The Lancet                          | 35.38                                          | Explorat ory | Broad                   | EQ-5D, FACT-          | Yes                                    | Cox proporti onal             | Neede d but               | Differen ce of                   | Repor ted                                 | Repo rted           | Experi mental arm            |

|    |                              |            |                                     |       |             |                        |                                      |     |                                                                                        |                     |                    |              |              |                                                           |
|----|------------------------------|------------|-------------------------------------|-------|-------------|------------------------|--------------------------------------|-----|----------------------------------------------------------------------------------------|---------------------|--------------------|--------------|--------------|-----------------------------------------------------------|
|    |                              |            | Oncology                            |       |             |                        | G, FKSI-19                           |     | hazard/Cox regression model, MMRM                                                      | not done            | X points           |              |              | is superior to control arm                                |
| 13 | Hui R <sup>46</sup>          | 10/7/2019  | The Lancet                          | 59.1  | Secondary   | Broad                  | EORTC QLQ-C30, EORTC QLQ-LC13, EQ-5D | Yes | Cox proportional hazard/Cox regression model, Log-rank test, MMRM, Logistic regression | Needed and done     | Change of X points | Reported     | Reported     | Similar outcomes between experimental arm and control arm |
| 14 | Weber J <sup>14</sup>        | 9/10/17    | The New England Journal of Medicine | 79.26 | Secondary   | No hypothesis reported | EORTC QLQ-C30, EQ-5D                 | Yes | Descriptive statistics                                                                 | Needed but not done | Change of X points | Reported     | Not reported | Similar outcomes between experimental arm and control arm |
| 16 | El-Khoueiry AB <sup>16</sup> | 04/20/2017 | The Lancet                          | 23.25 | Exploratory | No hypothesis reported | EQ-5D                                | Yes | Conventional wald method                                                               | Needed but not done | Not reported       | Not reported | Not reported | Stable PROs                                               |
| 18 | Laetsch T <sup>47</sup>      | 10/09/2019 | The Lancet                          | 59.1  | Secondary   | Broad                  | EQ-5D,                               | Yes | MMRM                                                                                   | Needed but          | Difference of      | Reported     | Reported     | Improvement in                                            |

|    |                            |            |                              |       |             |                        |                      |     |                                                                                             |                     |                    |              |              |                                             |
|----|----------------------------|------------|------------------------------|-------|-------------|------------------------|----------------------|-----|---------------------------------------------------------------------------------------------|---------------------|--------------------|--------------|--------------|---------------------------------------------|
|    |                            |            |                              |       |             |                        | Peds QL              |     |                                                                                             | not done            | X points           |              |              | key PROs                                    |
| 19 | Overman M <sup>19</sup>    | 7/19/17    | The Lancet Oncology          | 36.42 | Exploratory | No hypothesis reported | EORTC QLQ-C30, EQ-5D | Yes | Descriptive statistics                                                                      | Needed but not done | Change of X points | Reported     | Not reported | Improvement in key PROs                     |
| 20 | Vaughn D <sup>48</sup>     | 03/28/018  | Journal of Clinical Oncology | 26.36 | Exploratory | Broad                  | EORTC QLQ-C30, EQ-5D | No  | Cox proportional hazard/ Cox regression model, Log-rank test, Mixed effects model, cLDA/LDA | Needed but not done | Change of X points | Reported     | Reported     | Experimental arm is superior to control arm |
| 24 | Kaufman H <sup>49</sup>    | 08/12/2017 | Future Oncology              | 2.36  | Unclear     | Broad                  | EQ-5D, FACT-M        | Yes | Linear mixed effects model, Linear regression                                               | Needed but not done | Not reported       | Not reported | Reported     | Improvement in key PROs                     |
| 25 | Tresckow B <sup>50</sup>   | 4/23/19    | Leukemia & Lymphoma          | 2.64  | Exploratory | Broad                  | EORTC QLQ-C30, EQ-5D | Yes | cLDA/LDA                                                                                    | Needed but not done | Change of X points | Reported     | Reported     | Improvement in key PROs                     |
| 27 | Harrington K <sup>51</sup> | 6/23/17    | The Lancet                   | 36.4  | Exploratory | Broad                  | EORTC QLQ-           | Yes | Cox proportional                                                                            | Needed but          | Both               | Reported     | Reported     | Experimental arm                            |



|      |                             |         |                              |       |             |       |                                      |     |                                                                                            |                     |                    |          |          |                                             |
|------|-----------------------------|---------|------------------------------|-------|-------------|-------|--------------------------------------|-----|--------------------------------------------------------------------------------------------|---------------------|--------------------|----------|----------|---------------------------------------------|
|      |                             |         | Oncology                     |       |             |       | C30, EORTC QLQ-H&N35, EQ-5D          |     | hazard/Cox regression model, ANCOVA, Brookmeyer and crowley                                | not done            |                    |          |          | is superior to control arm                  |
| 28-a | Brahmer JR <sup>52</sup>    | 11/9/17 | The Lancet Oncology          | 36.4  | Exploratory | Broad | EORTC QLQ-C30, EORTC QLQ-LC13, EQ-5D | Yes | Cox proportional hazard/Cox regression model, Log-rank test, cLDA/LDA                      | Needed but not done | Change of X points | Reported | Reported | Experimental arm is superior to control arm |
| 28-b | Barlesi et al <sup>53</sup> | 1/31/19 | Journal of Thoracic Oncology | 10.34 | Exploratory | Broad | EORTC QLQ-C30, EORTC QLQ-LC13, EQ-5D | Yes | Cox proportional hazard/Cox regression model, Log-rank test, Mixed effects model, cLDA/LDA | Needed but not done | Change of X points | Reported | Reported | Experimental arm is superior to control arm |

|      |                              |          |                      |      |             |                        |                                 |     |                                                                                                     |                     |                    |              |              |                                             |
|------|------------------------------|----------|----------------------|------|-------------|------------------------|---------------------------------|-----|-----------------------------------------------------------------------------------------------------|---------------------|--------------------|--------------|--------------|---------------------------------------------|
| 29-a | Bordon i et al <sup>54</sup> | 5/31/18  | Clinical Lung Cancer | 4.11 | Secondary   | Broad                  | EORT C QLQ-C30, EORT C QLQ-LC13 | Yes | Cox proportional hazard/ Cox regression model, Log-rank test, ANCOVA                                | Needed but not done | Change of X points | Not reported | Reported     | Experimental arm is superior to control arm |
| 32   | Younes A <sup>34</sup>       | 7/20/16  | The Lancet Oncology  | 33.9 | Exploratory | No hypothesis reported | EORT C QLQ-C30, EQ-5D           | No  | Descriptive statistics                                                                              | Needed but not done | Not reported       | Not reported | Not reported | Improvement in key PROs                     |
| 33   | Cella D <sup>55</sup>        | 6/6/16   | The Lancet Oncology  | 33.9 | Secondary   | Broad                  | FKSI-DRS, EQ-5D                 | Yes | Cox proportional hazard/ Cox regression model, Mixed effects model, MMRM, Chi-squared test, t-tests | Needed but not done | Change of X points | Reported     | Reported     | Experimental arm is superior to control arm |
| 34   | Coens C <sup>56</sup>        | 11/10/17 | The Lancet Oncology  | 26.5 | Secondary   | Specific               | EORT C QLQ-C30                  | Yes | Linear mixed effects model                                                                          | Needed and done     | Change of X points | Reported     | Reported     | Experimental arm is inferior                |

|    |                           |           |                              |       |           |            |                                               |     |                                                                                 |                     |                    |          |          |                                             |
|----|---------------------------|-----------|------------------------------|-------|-----------|------------|-----------------------------------------------|-----|---------------------------------------------------------------------------------|---------------------|--------------------|----------|----------|---------------------------------------------|
|    |                           |           |                              |       |           |            |                                               |     |                                                                                 |                     |                    |          |          | r to control arm                            |
| 35 | Reck M <sup>57</sup>      | 8/10/18   | European Journal of Cancer   | 6.68  | Secondary | Specific ‡ | EQ-5D, LCSS                                   | Yes | Cox proportional hazard/ Cox regression model, MMRM, t-tests, Clopper - pearson | Needed but not done | Both               | Reported | Reported | Experimental arm is superior to control arm |
| 38 | Reck M <sup>58</sup>      | 11/10/17  | Journal of Thoracic Oncology | 10.34 | Secondary | Specific ‡ | EQ-5D, LCSS                                   | Yes | Cox proportional hazard/ Cox regression model, MMRM, t-tests, Clopper - pearson | Needed but not done | Both               | Reported | Reported | Experimental arm is superior to control arm |
| 41 | Bottomley A <sup>59</sup> | 11/5/2009 | Journal of Clinical Oncology | 17.7  | Secondary | Specific   | EORTC QLQ-C30, IFN-specific symptom checklist | No  | Cox proportional hazard/ Cox regression model, Log-rank test,                   | Needed and done     | Change of X points | Reported | Reported | Experimental arm is inferior to control arm |

|    |                         |         |                                     |      |         |       |               |     |                                                                              |                     |              |          |          |                                                           |
|----|-------------------------|---------|-------------------------------------|------|---------|-------|---------------|-----|------------------------------------------------------------------------------|---------------------|--------------|----------|----------|-----------------------------------------------------------|
|    |                         |         |                                     |      |         |       |               |     | Linear mixed effects model, Logistic regression, Chi-squared test, Rank test |                     |              |          |          |                                                           |
| 42 | Revicki D <sup>60</sup> | 6/13/12 | Health and Quality of Life Outcomes | 2.27 | Unclear | Broad | EORTC QLQ-C30 | Yes | ANOVA                                                                        | Needed but not done | Not reported | Reported | Reported | Similar outcomes between experimental arm and control arm |

Abbreviations: NSCLC, non-small cell lung cancer; SCLC, small cell lung cancer; SCCHN, squamous cell carcinoma of the head and neck; PRO, patient reported outcomes; EQ-5D, EuroQoI-5D; EORTC QLQ-C30, European Organisation for Research and Treatment of Cancer Quality of Life Questionnaire-core questionnaire; EORTC QLQ-LC13, EORTC QLQ-Lung Cancer Module; LCSS, Lung Cancer Symptom Scale; IFN, Interferon; FCSI-DRS, Functional Assessment of Cancer Therapy - Kidney Symptom Index - Disease related Symptoms; FACT-G, Functional Assessment of Cancer Therapy: General; FACT-M, FACT-Melanoma; PedsQL, Pediatric Quality of Life Inventory™; MMRM, Mixed-model for repeated measures; LDA, longitudinal data analysis; cLDA, constrained LDA; ANOVA, analysis of variance; ANCOVA, analysis of covariance.

\*Led to the same FDA approval

†Led to the same FDA approval

‡Found only in the protocol

Supplementary Table 3. Publishing PROs according to immunotherapy type, trial phase, randomization, approval type, cancer type

| Variable                   | Published PRO data |         | p value |
|----------------------------|--------------------|---------|---------|
|                            | Yes                | No      |         |
| Immunotherapy type         |                    |         | 0.5     |
| Anti-PD1                   | 12 (44)            | 15 (56) |         |
| Anti-PDL1                  | 3 (38)             | 5 (63)  |         |
| CAR-T                      | 1 (33)             | 2 (68)  |         |
| Anti-CTLA4                 | 2 (100)            | 0       |         |
| Anti-PD1 + Anti-CTLA4      | 2 (67)             | 1 (33)  |         |
| Interferon                 | 1 (100)            | 0       |         |
| Clinical trial phase       |                    |         | 0.012   |
| Phase I                    | 0                  | 4 (100) |         |
| Phase II                   | 7 (33)             | 14 (67) |         |
| Phase III                  | 13 (77)            | 4 (24)  |         |
| Phase IV                   | 1 (50)             | 1 (50)  |         |
| Randomization              |                    |         | 0.68    |
| Single-arm study           | 7 (33)             | 14 (67) |         |
| Randomized trial           | 14 (61)            | 9 (39)  |         |
| Approval type              |                    |         | 0.03    |
| Regular                    | 15 (63)            | 9 (38)  |         |
| Accelerated                | 6 (30)             | 14 (70) |         |
| Cancer type                |                    |         | 0.32    |
| Non-small cell lung cancer | 6 (50)             | 6 (50)  |         |
| Melanoma                   | 4 (57)             | 3 (43)  |         |
| Urothelial carcinoma       | 1 (20)             | 4 (80)  |         |
| Large B-cell lymphoma      | 0                  | 3 (100) |         |
| Colorectal adenocarcinoma  | 2 (100)            | 0       |         |
| Hepatocellular carcinoma   | 1 (50)             | 1 (50)  |         |
| Hodgkin lymphoma           | 2 (100)            | 0       |         |
| Merkel cell carcinoma      | 1 (50)             | 1 (50)  |         |

|                                              |         |         |      |
|----------------------------------------------|---------|---------|------|
| Renal cell carcinoma                         | 2 (100) | 0       |      |
| Squamous cell carcinoma of the head and neck | 1 (50)  | 1 (50)  |      |
| Small cell lung cancer                       | 0       | 1 (100) |      |
| Gastric/gastroesophageal adenocarcinoma      | 0       | 1 (100) |      |
| Cutaneous squamous cell carcinoma            | 0       | 1 (100) |      |
| Cervical cancer                              | 0       | 1 (100) |      |
| Acute lymphoblastic leukemia                 | 1 (100) | 0       |      |
| Approval indication                          |         |         | 0.25 |
| First line                                   | 3 (33)  | 6 (67)  |      |
| Second line                                  | 10 (48) | 11 (52) |      |
| Third line or more                           | 4 (40)  | 6 (60)  |      |
| Maintenance                                  | 1 (100) | 0       |      |
| Adjuvant                                     | 3 (100) | 0       |      |
| Primary endpoint                             |         |         | 0.7  |
| Included OS                                  | 10 (67) | 5 (33)  |      |
| Did not include OS                           | 11 (38) | 18 (62) |      |

Abbreviations: PD1, programmed cell death 1; PDL1, PD-ligand 1; CAR-T, chimeric antigen receptor T; CTLA4, cytotoxic T lymphocyte associated protein 4; OS, overall survival

Supplementary Table 4. Comparison of reporting characteristics between PROs published in a secondary dedicated manuscript (n=16) and those published in the primary manuscript only (n=5)

| Variable                                   | PRO in a secondary dedicated manuscript (n=16); N (%) | PRO in the primary manuscript only (n=5); N (%) | p value |
|--------------------------------------------|-------------------------------------------------------|-------------------------------------------------|---------|
| Year of FDA approval                       |                                                       |                                                 | 0.15    |
| 2008 - 2015                                | 6 (38)                                                | 0                                               |         |
| 2016 - 2018                                | 10 (63)                                               | 5 (100)                                         |         |
| Randomized clinical trial                  |                                                       |                                                 | 0.03    |
| Yes                                        | 13 (81)                                               | 1 (20)                                          |         |
| No                                         | 3 (19)                                                | 4 (80)                                          |         |
| Specific PRO hypothesis                    | 4 (25)                                                | 0                                               | 0.30    |
| PRO endpoint                               |                                                       |                                                 | 0.60    |
| Secondary                                  | 8 (50)                                                | 1 (20)                                          |         |
| Exploratory                                | 6 (38)                                                | 4 (80)                                          |         |
| Unclear                                    | 2 (13)                                                | 0                                               |         |
| Reference of the PRO instrument provided   | 14 (88)                                               | 4 (80)                                          | 0.58    |
| PRO collection method reported             | 11 (69)                                               | 0                                               | 0.01    |
| Site-specific PRO instrument               | 9 (56)                                                | 0                                               | 0.04    |
| Control for type I error                   | 3 (19)                                                | 0                                               | 0.42    |
| Clinical relevance thresholds defined      | 14 (88)                                               | 3 (60)                                          | 0.23    |
| Completion/compliance rate table provided  | 14 (88)                                               | 3 (60)                                          | 0.23    |
| Strategy to deal with missing data defined | 14 (88)                                               | 3 (60)                                          | 0.23    |
| PRO specific study limitations reported    | 16 (100)                                              | 0                                               | <0.0001 |
| PRO data conclusion reported               | 16 (100)                                              | 5 (100)                                         | 1       |

Abbreviations: PRO, patient-reported outcomes; FDA, Food and Drug Administration. Numbers are rounded to the nearest whole number.
